# Supplementary material for: The marine methane cycle in the Canadian Arctic Archipelago during summer
Source: Copernicus journal article supplement (doi:10.5194/bg-2023-157), 2023-09-22
Supplement: Supplementary file 1 [file bg-2023-157-supplement.pdf]

1 **Supplemental material**

2

3 Eq. S1:  $\frac{[CH_4]_{av.west} - [CH_4]_{av.east}}{[CH_4]_{av.west} + [CH_4]_{av.east}} * 100 (\%)$

4

5 Table S1: All seawater methane samples collected for measuring the dissolved methane concentrations and  
 6 the potential oxidation rates. Here we show all the samples collected, including the duplicated samples  
 7 (28x2 experimental and 76 discrete).

8

| Stations | Depth (m) | Date collection | In-situ samples | Methane incubations |
|----------|-----------|-----------------|-----------------|---------------------|
| 3        | 609       | 7/20/2019       | x               | x                   |
| 3        | 419       | 7/20/2019       | x               |                     |
| 3        | 310       | 7/20/2019       | x               |                     |
| 3        | 151       | 7/20/2019       | x               |                     |
| 3        | 71        | 7/20/2019       | x               |                     |
| 3        | 40        | 7/20/2019       | x               |                     |
| 3        | 7         | 7/20/2019       | x               | x                   |
| 5        | 745       | 7/22/2019       | x               | x                   |
| 5        | 601       | 7/22/2019       | x               |                     |
| 5        | 455       | 7/22/2019       | x               |                     |
| 5        | 381       | 7/22/2019       | x               |                     |
| 5        | 175       | 7/22/2019       | x               |                     |
| 5        | 21        | 7/22/2019       | x               | x                   |
| 5        | 1         | 7/22/2019       | x               | x                   |
| 8        | 561       | 7/23/2019       | x               |                     |
| 8        | 451       | 7/23/2019       | x               | x                   |
| 8        | 390       | 7/23/2019       | x               |                     |
| 8        | 210       | 7/23/2019       | x               |                     |
| 8        | 101       | 7/23/2019       | x               |                     |
| 8        | 70        | 7/23/2019       | x               | x                   |
| 8        | 15        | 7/23/2019       | x               | x                   |
| 8        | 1         | 7/23/2019       | x               |                     |
| 16       | 690       | 7/24/2019       | x               | x                   |
| 16       | 502       | 7/24/2019       | x               | x                   |
| 16       | 378       | 7/24/2019       | x               |                     |
| 16       | 202       | 7/24/2019       | x               |                     |
| 16       | 101       | 7/24/2019       | x               |                     |
| 16       | 65        | 7/24/2019       | x               |                     |
| 16       | 30        | 7/24/2019       | x               |                     |
| 16       | 1         | 7/24/2019       | x               | x                   |
| 20       | 144       | 7/26/2019       | x               | x                   |
| 20       | 110       | 7/26/2019       | x               |                     |
| 20       | 81        | 7/26/2019       | x               |                     |
| 20       | 50        | 7/26/2019       | x               |                     |

|    |     |           |   |   |
|----|-----|-----------|---|---|
| 20 | 28  | 7/26/2019 | x | x |
| 20 | 19  | 7/26/2019 | x |   |
| 20 | 2   | 7/26/2019 | x |   |
| 21 | 136 | 7/26/2019 | x | x |
| 21 | 75  | 7/26/2019 | x |   |
| 21 | 45  | 7/26/2019 | x |   |
| 21 | 15  | 7/26/2019 | x |   |
| 21 | 10  | 7/26/2019 | x | x |
| 23 | 181 | 7/28/2019 | x | x |
| 23 | 101 | 7/28/2019 | x |   |
| 23 | 26  | 7/28/2019 | x |   |
| 23 | 5   | 7/28/2019 | x | x |
| 26 | 208 | 7/29/2019 | x | x |
| 26 | 150 | 7/29/2019 | x |   |
| 26 | 100 | 7/29/2019 | x |   |
| 26 | 75  | 7/29/2019 | x |   |
| 26 | 25  | 7/29/2019 |   | x |
| 26 | 1   | 7/29/2019 | x |   |
| 30 | 251 | 7/30/2019 | x | x |
| 30 | 151 | 7/30/2019 | x |   |
| 30 | 76  | 7/30/2019 | x |   |
| 30 | 28  | 7/30/2019 | x | x |
| 30 | 2   | 7/30/2019 | x |   |
| 31 | 207 | 7/30/2019 | x | x |
| 31 | 131 | 7/30/2019 | x |   |
| 31 | 61  | 7/30/2019 | x |   |
| 31 | 36  | 7/30/2019 | x | x |
| 31 | 2   | 7/30/2019 | x |   |
| 41 | 380 | 8/1/2019  | x | x |
| 41 | 316 | 8/1/2019  | x |   |
| 41 | 200 | 8/1/2019  | x |   |
| 41 | 173 | 8/1/2019  | x |   |
| 41 | 90  | 8/1/2019  | x |   |
| 41 | 45  | 8/1/2019  | x |   |
| 41 | 25  | 8/1/2019  | x | x |
| 41 | 1   | 8/1/2019  | x |   |
| 52 | 241 | 8/4/2019  | x | x |
| 52 | 200 | 8/4/2019  | x |   |
| 52 | 76  | 8/4/2019  | x |   |
| 52 | 30  | 8/4/2019  | x |   |
| 52 | 10  | 8/4/2019  | x |   |
| 52 | 7   | 8/4/2019  | x | x |
| 52 | 2   | 8/4/2019  | x |   |

---

10 Table S2: Dissolved in-situ methane in sea ice. In the table below we showed the sample ID, the vertical  
 11 horizon along the core length, the temperature of sea ice, the methane isotopic signature, and the methane  
 12 concentration. The sea ice salinity data were generated by the University of Illinois at Chicago and are  
 13 publicly available at <https://doi.pangaea.de/10.1594/PANGAEA.937543>.

14

| Sea Ice ID | Depth (cm) | Temperature (°C) | $\delta^{13}\text{CH}_4$ (‰) | [CH <sub>4</sub> ] (nM) |
|------------|------------|------------------|------------------------------|-------------------------|
| 1          | 10         | 2.1              | -35.39                       | 3.40                    |
| 1          | 52         | 1.7              | -46.38                       | 21.25                   |
| 1          | 82         | 1.4              | -47.79                       | 8.49                    |
| 1          | 117        | 1.3              | -39.77                       | 8.32                    |
| 1          | 190        | 1.2              | -46.64                       | 17.06                   |
| 2          | 20         | 2                | -42.00                       | 8.01                    |
| 2          | 50         | 1.2              | -45.04                       | 8.46                    |
| 2          | 70         | 1.2              | -47.24                       | 6.25                    |
| 2          | 90         | 1.6              | -41.61                       | 7.76                    |
| 2          | 100        | 1.7              | -39.49                       | 4.11                    |
| 3          | 10         | 1.8              | -42.79                       | 10.32                   |
| 3          | 30         | 1.3              | -47.20                       | 6.95                    |
| 3          | 60         | 0.9              | -51.38                       | 6.30                    |
| 3          | 90         | 0.8              | -45.53                       | 11.66                   |
| 4          | 20         | 1.4              | -40.15                       | 6.54                    |
| 4          | 30         | 0.9              | -38.65                       | 5.96                    |
| 4          | 90         | 0.4              | -37.35                       | 5.63                    |
| 4          | 130        | 0.1              | -40.78                       | 7.33                    |
| 4          | 146        | 0.1              | -42.66                       | 6.34                    |
| 5          | 10         | 0.4              | -38.65                       | 5.97                    |
| 5          | 20         | 0.5              | -44.07                       | 18.99                   |
| 5          | 50         | 0.9              | -40.42                       | 6.15                    |
| 5          | 70         | 1.2              | -47.65                       | 20.78                   |
| 5          | 91         | 1.3              | -36.73                       | 8.23                    |

15

16

17 Table S3: Incubation time of experimental samples collected at each CTD station.

18

| CTD station           | Days of incubation |
|-----------------------|--------------------|
| Jones Sound           | 24                 |
| West Navy Board Inlet | 19                 |
| Wellington Channel    | 5                  |
| Prince Regent Sound   | 12                 |
| Croker Bay            | 7                  |

19

20 Table S4: Information on experimental samples is presented in the table below, including the sampling  
 21 location and depth, collection date, and volume of methane standard injected into each sample for oxidation  
 22 rate measurement.

| CTD station              | Date      | Depth (m) | CH <sub>4</sub> spike (ml) |
|--------------------------|-----------|-----------|----------------------------|
| Jones Sound              | 7/19/2019 | 609       | 1                          |
| Jones Sound              | 7/19/2019 | 7         | 1                          |
| West of Navy Board Inlet | 7/23/2019 | 70        | 2.5                        |
| West of Navy Board Inlet | 7/23/2019 | 15        | 2.5                        |
| West of Navy Board Inlet | 7/23/2019 | 450       | 2.5                        |
| West of Navy Board Inlet | 7/23/2019 | 70        | 2.5                        |
| West of Navy Board Inlet | 7/24/2019 | 743       | 2.5                        |
| West of Navy Board Inlet | 7/24/2019 | 401       | 2.5                        |
| Wellington Channel       | 7/26/2019 | 10        | 2.5                        |
| Prince Regent Sound      | 7/31/2019 | 25        | 2.5                        |
| Croker Bay               | 8/3/2019  | 7         | 2.5                        |
| Croker Bay               | 8/3/2019  | 241       | 2.5                        |

24  
25  
26

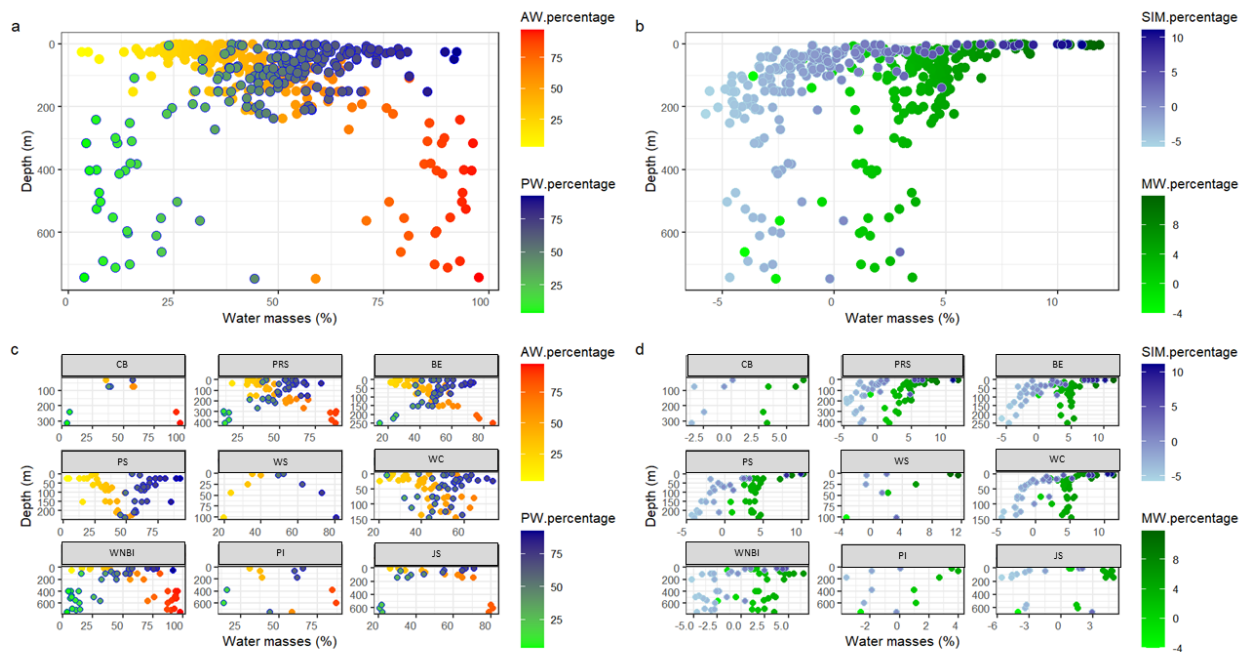

27  
28  
29  
30  
31  
32  
33  
34  
35

Figure S1: Profiles of water mass fractions across depth. Figure S1a depicts the distribution of water mass fractions, specifically the percentages of Atlantic Waters (AW) and Pacific Waters (PW). In Figure S1b, the contribution of meltwater, encompassing meteoric meltwater (MW) and sea ice meltwaters (SIM), is presented as percentages. Figure S1c displays the percentages of AW and PW at each station. Finally, Figure S1d illustrates the percentages of MW and SIM at each station. These profiles provide valuable insights into the variations and contributions of different water masses throughout the depth profile. The headers represent the sampling station as described in Fig. 1.

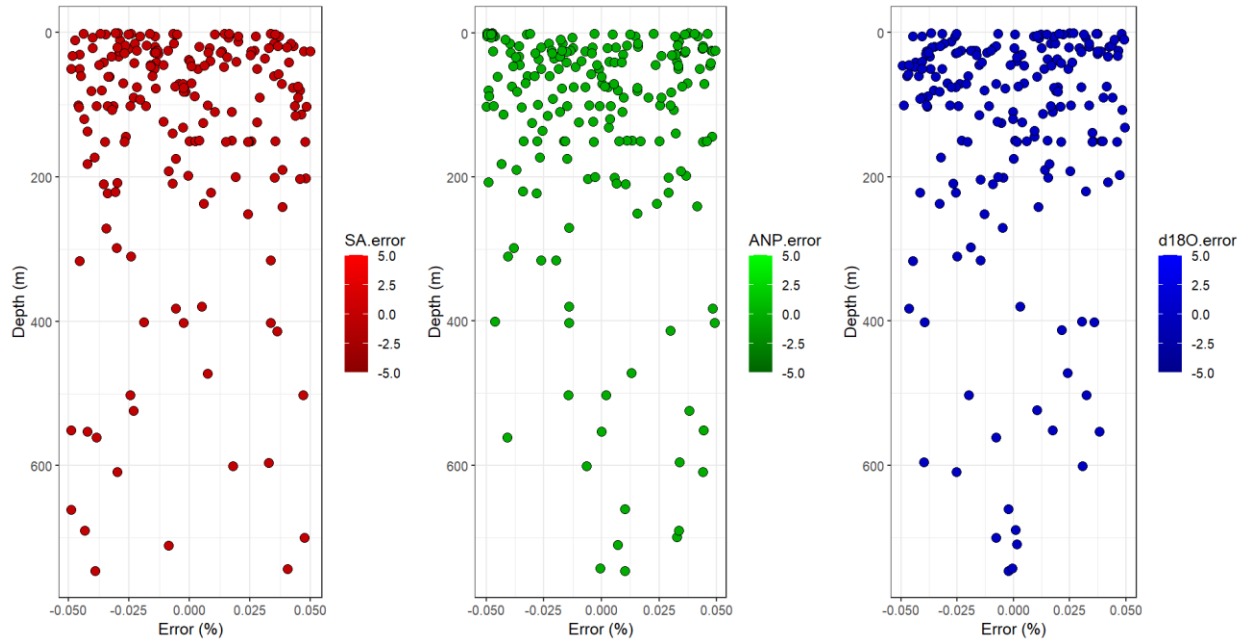

36  
 37 Figure S2: The graph illustrates calculated errors for each endmember in the basic 4-endmember mass  
 38 balance. It highlights mass fractions with deviations exceeding 5% from the expected value of 1, signifying  
 39 notable discrepancies. Remarkably, all data points on the graph fall within a narrow range (-0.05% to  
 40 0.05%), indicating a favorable level of uncertainty. The SA endmember is denoted by the red color code,  
 41 ANP by the green color, and  $\delta^{18}\text{O}$  by the blue color.

42

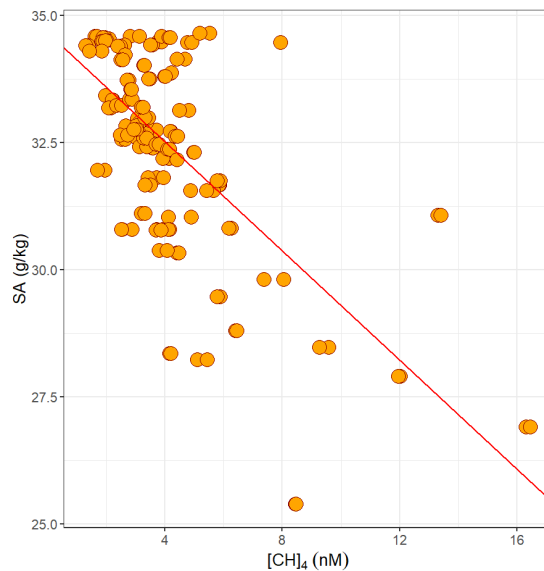

43  
 44 Figure S3: Scatterplot of the in-situ methane concentration  $[\text{CH}_4]$  and absolute salinity (SA) with a robust  
 45 linear regression line. The abline to the plot is based on the intercept and slope estimates from the robust  
 46 linear regression model. ( $R^2$ : 0.4223, p-value:  $< 2.2\text{e-}16$ ).

47

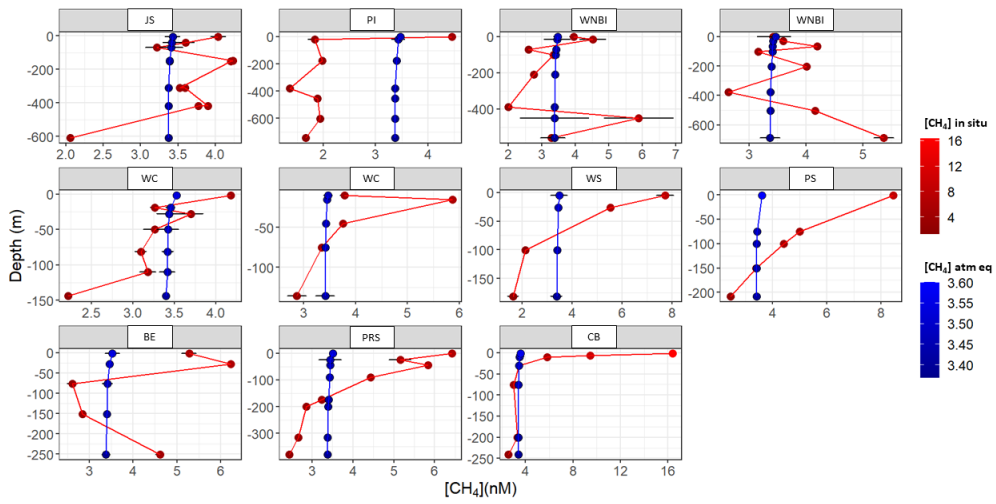

48

49 Figure S4: All methane vertical profiles. In red are the in-situ  $[CH_4]$ , while in blue are the  $[CH_4]$  at  
 50 atmospheric equilibrium. The headers show the CTD stations as described in Fig.1.

51

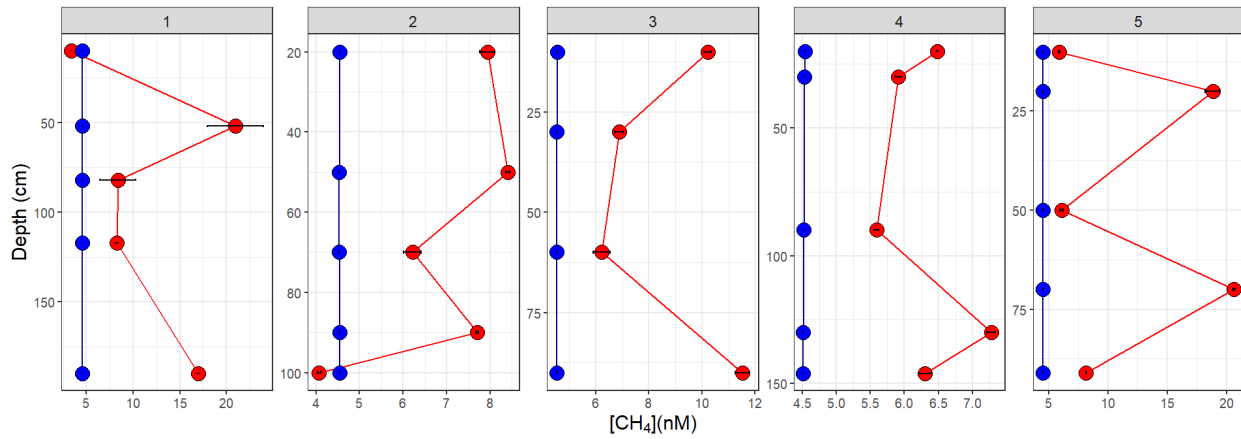

52

53 Figure S5: All methane vertical profiles within sea ice cores. In red are the in-situ  $[CH_4]$ , while in blue are  
 54 the  $[CH_4]$  at atmospheric equilibrium. The headers show the ice core numbers, as described in Fig.1.

55

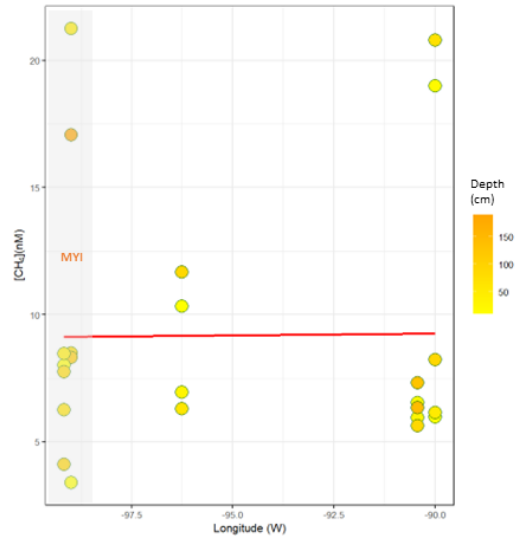

56  
 57 Figure S6: Methane concentrations within sea ice, across the longitudinal scale. The color code shows the  
 58 sea ice core length (cm). The red line describes the linear model within the scattered data.

59

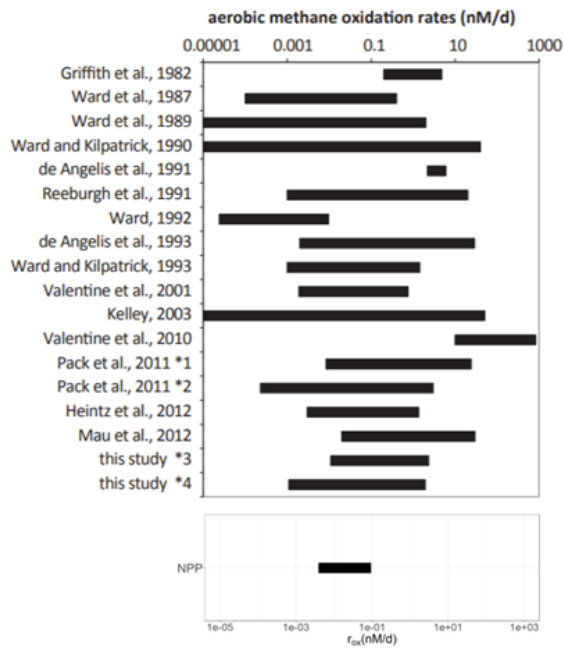

60  
 61 Figure S7: comparison between methane oxidation rates measured in our study (NPP) and previous  
 62 literature. The box on the top (from Mau et al., 2013) showed the range of methane oxidation rates measured  
 63 at different locations in the ocean water column derived from tracer incubations using  $^3\text{H-CH}_4$  (Reeburgh  
 64 et al., 1991; Valentine et al., 2001, 2010; Heintz et al., 2012, Mau et al., 2012) or  $^{14}\text{C-CH}_4$  (all others). Pack  
 65 et al. (2011) compared incubations with  $^3\text{H-CH}_4$  (\*1) and incubations with low-level  $^{14}\text{C-CH}_4$  (\*2) that were  
 66 measured with accelerator mass spectrometry. In this study, Mau et al. (2013) compared incubations with

67  $^3\text{H-CH}_4$  (\*3) and incubations with  $^{14}\text{C-CH}_4$  (\*4). The box in the bottom showed the methane oxidation rates  
 68 measured during the NPP expedition. The x axis is in log scale.

69

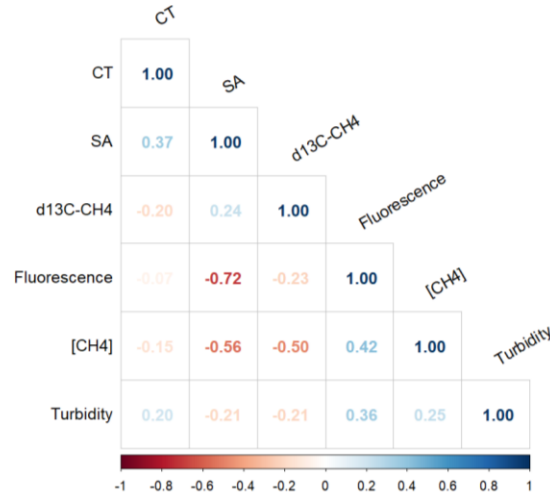

70

71 Figure S8: Spearman's correlation plot of in-situ methane data and physical data of the water masses.

72

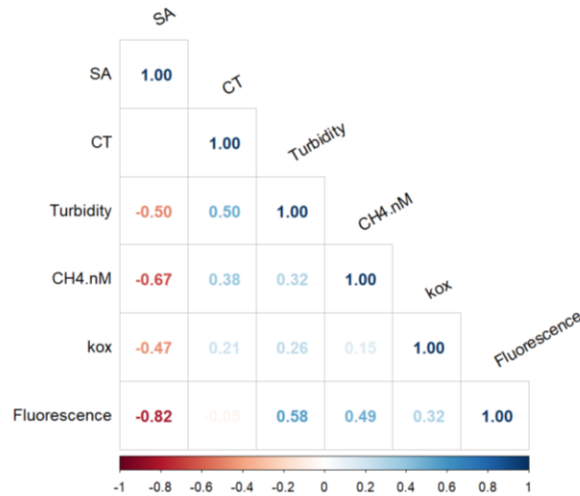

73

74 Figure S9: Spearman's correlation plot of in-vitro methane oxidation rate and physical data of the water  
 75 masses. Here, we also showed the in-situ methane concentration (CH4.nM) in order to relate it with the  
 76 oxidation rate constant.

77
